## TrkB Agonist LM22A-4 Increases Oligodendroglial Populations During Myelin Repair in the Brain

1 **Huynh TH Nguyen<sup>1§</sup>, Rhiannon J Wood<sup>1</sup>, Alexa R Prawdiuk<sup>1</sup>, Sebastian GB Furness<sup>2</sup>, Junhua**  
2 **Xiao<sup>1</sup>, Simon S Murray<sup>1§\*</sup> and Jessica L Fletcher<sup>1§\*</sup>**

3 <sup>1</sup>Department of Anatomy and Neuroscience, School of Biomedical Sciences, Faculty of Medicine,  
4 Dentistry and Health Sciences, University of Melbourne, Parkville, VIC, Australia

5 <sup>2</sup>Drug Discovery Biology and Department of Pharmacology, Monash Institute of Pharmaceutical  
6 Sciences, Monash University, Parkville, VIC, Australia

7 § authors contributed equally to this work

8 \* **Correspondence:**

9 Dr Jessica L Fletcher or Dr Simon S Murray

10 [jessica.fletcher@unimelb.edu.au](mailto:jessica.fletcher@unimelb.edu.au) or [ssmurray@unimelb.edu.au](mailto:ssmurray@unimelb.edu.au)

11 **Keywords: myelin, neurotrophin, oligodendrocytes, remyelination, TrkB, BDNF**

12 **Abstract**

13 The neurotrophin, brain-derived neurotrophic factor (BDNF) promotes central nervous system (CNS)  
14 myelination during development and after injury. This is achieved via activation of oligodendrocyte-  
15 expressed tropomyosin-related kinase (Trk) B receptors. However, while administration of BDNF  
16 has shown beneficial effects, BDNF itself has a poor pharmacokinetic profile. Here, we compare two  
17 TrkB-targeted BDNF-mimetics, the structural-mimetic, tricyclic dimeric peptide-6 (TDP6) and the  
18 non-peptide small molecule TrkB agonist LM22A-4 in the cuprizone model of central demyelination  
19 in female mice. Both mimetics promoted remyelination, increasing myelin sheath thickness and  
20 oligodendrocyte densities after one-week recovery. Importantly, LM22A-4 exerts these effects in an  
21 oligodendroglial TrkB-dependent manner. However, analysis of TrkB signaling by LM22A-4  
22 suggests rather than direct activation of TrkB, LM22A-4 exerts its effects via indirect transactivation  
23 of Trk receptors. Overall, these studies support the therapeutic strategy to selectively targeting TrkB  
24 activation to promote remyelination in the brain.

## 25 1 Introduction

26 The neurotrophin, brain-derived neurotrophic factor (BDNF) is an attractive therapeutic for many  
27 neurodegenerative diseases due to its broad neuroprotective effects promoting neuronal survival,  
28 synaptic plasticity and central nervous system (CNS) myelination (Chao, 2003; Fletcher et al., 2018b;  
29 Longo and Massa, 2013). Its action *via* oligodendrocyte expressed TrkB to potentiate and enhance  
30 myelination (Du et al., 2003; Wong et al., 2013; Xiao et al., 2011) makes it particularly promising for  
31 central demyelinating diseases such as multiple sclerosis (MS), where there is an unmet clinical need  
32 for remyelinating therapies to halt disease progression. However, BDNF itself has poor  
33 pharmacokinetic properties; it is non-selective, also acting through the pan-neurotrophic receptor  
34 p75<sup>NTR</sup>, has a short-half life and has high molecular weight, limiting its ability to penetrate the blood-  
35 brain barrier (Longo and Massa, 2013; Poduslo and Curran, 1996). To overcome these limitations a  
36 range of small molecule BDNF-mimetics that selectively target the TrkB receptor have been  
37 developed (Longo and Massa, 2013). This includes tricyclic dimeric peptide-6 (TDP6) (O’Leary and  
38 Hughes, 2003) and the partial TrkB agonist, LM22A-4 (Massa et al., 2010).

39 TDP6 is a structural peptide mimetic, designed to mimic the Loop 2 region of BDNF that is known to  
40 interact with TrkB (Chao, 2003; O’Leary and Hughes, 2003). We have previously shown that TDP6  
41 mimics BDNF in promoting neuronal survival (O’Leary and Hughes, 2003) and enhancing  
42 myelination both *in vitro* (Wong et al., 2014) and during myelin repair following cuprizone  
43 demyelination *in vivo* (Fletcher et al., 2018a). Similarly, LM22A-4 was identified during an *in silico*  
44 screen to identify compounds with potential to mimic the Loop2 region of BDNF and is a non-  
45 peptide, partial TrkB agonist (Massa et al., 2010). It is 98% smaller than BDNF and has been shown  
46 to have therapeutic potential in preventing neurodegeneration in animal models of traumatic brain  
47 injury, stroke, Huntington’s disease and Rhatt syndrome (Gu et al., 2018; Han et al., 2012; Massa et  
48 al., 2010; Schmid et al., 2012; Simmons et al., 2013) but has not yet been tested in the context of  
49 central demyelinating disease such as MS.

50 Here, we compare the effect of intra-cerebroventricular (ICV) administration of these BDNF  
51 mimetics following cuprizone demyelination in mice. Both mimetics promoted remyelination, in  
52 particular myelin sheath thickness, after one-week recovery. Interestingly, LM22A-4 increased the  
53 density of oligodendroglia in the corpus callosum more than TDP6. Importantly, these effects were  
54 dependent on TrkB, as post-cuprizone treatment with LM22A-4 in mice with conditional deletion of  
55 TrkB from oligodendrocytes abrogated the effects on both remyelination and oligodendroglial  
56 density. While this indicates that LM22A-4 promotes myelin repair in a TrkB dependent manner,  
57 assessment of TrkB phosphorylation and signaling *in vitro* suggests that LM22A-4 may not activate  
58 TrkB directly, but rather result in delayed TrkB transactivation *via* a GPCR-mediated mechanism.  
59 Collectively these data further verify that targeting TrkB activation is a cogent strategy to promote  
60 myelin repair in the brain, and that alternate small molecule mimetic strategies are effective towards  
61 this end. Further studies aimed at elucidating the precise mechanism of action are warranted to  
62 optimize the therapeutic potential of this approach.

63

## 64 2 Materials and Methods

### 65 2.1 Experimental animals and cuprizone induced demyelination

66 Female C57BL/6 mice aged 8 weeks were fed 0.2% cuprizone in normal chow (Teklad Custom  
67 Research Diets, USA) for 6 weeks to induce demyelination. Cuprizone feed was removed, and mice  
68 were sacrificed or received intracerebroventricular osmotic pumps for 7 days.

69 For experiments in conditional knockout mice, female, 8-10 week-old CNPase<sup>+/-</sup> x TrkB<sup>fl/fl</sup> (Fletcher  
70 et al., 2018a; Lappe-Siefke et al., 2003; Lulkart et al., 2005) on C57BL/6 background underwent the  
71 procedures described above.

72 All mice were housed in specific pathogen free conditions at the Melbourne Brain Centre Animal  
73 Facility. All animal procedures were approved by the Florey Institute for Neuroscience and Mental  
74 Health Animal Ethics Committee and followed the Australian Code of Practice for the Care and Use  
75 of Animals for Scientific Purposes.

### 76 2.2 Intracerebroventricular delivery of LM22A-4 and TDP6

77 Following cuprizone feeding, mice received either: 40µM TDP6, 500µM LM22A-4 or the artificial  
78 cerebrospinal fluid (aCSF) vehicle intracerebroventricularly (ICV) as described in Fletcher et al.,  
79 2018a. Briefly, cannulae of osmotic pumps (flow rate: 0.5µL/hr, Azlet) were stereotaxically inserted  
80 over the right lateral ventricle under isoflurane anesthesia. Infusion concentrations of TDP6 and  
81 LM22A-4 were determined based on previous *in vitro* studies characterizing their effective  
82 concentrations (Massa et al., 2010; Wong et al., 2014). TDP6 infused animals were the same animals  
83 from Fletcher et al. 2018 and LM22A-4 infusion experiments were performed concurrently.  
84 Following stereotaxic surgery all mice were placed in a recovery chamber maintained at 32°C and  
85 were monitored for adverse reactions immediately following surgery and then daily. After 7 days of  
86 ICV infusion, mice were taken for necropsy and brain removed for immunostaining and electron  
87 microscopy (EM).

### 88 2.3 Tissue processing and immunofluorescence

89 Mice were anaesthetized and transcardially perfused with 0.1M sterile mouse isotonic phosphate  
90 buffered saline (PBS) followed by 4% paraformaldehyde (PFA). Brains were collected and post-  
91 fixed overnight in 4% PFA. The first millimeter of the right hemisphere from the sagittal midline was  
92 selected for EM processing as previously described (Fletcher et al., 2018a). The remaining tissue and  
93 contralateral hemisphere were cryoprotected in 30% sucrose prior to embedding in OCT. Frozen  
94 sections were cut in the sagittal orientation at 10µm thickness using a cryostat maintained between -  
95 20 to -17°C and collected on SuperfrostPlus slides, air-dried and stored at -80°C until use.  
96 Approximately 70-100µm separated adjacent sections on each slide.

97 Immunofluorescent staining was performed as previously described (Fletcher et al., 2018a). Briefly,  
98 slides were washed in PBS before overnight incubation at room temperature with primary antibodies.  
99 Slides were then washed and incubated with the appropriate fluorophore-conjugated secondary  
100 antibody for 2 hours at room temperature in the dark. Slides were washed, and counterstained with  
101 nuclear marker Hoescht33442 before mounting with aqueous mounting media (DAKO). All  
102 immunohistochemistry was performed in batches.

103 Antibodies used were: rat anti-myelin basic protein (MBP, 1:200, MAB386, Millipore, MA, USA),  
104 rabbit anti-Olig2 (1:200, AB9610, Millipore, MA, USA), mouse anti-CC1 (1:200, APC, OP80,  
105 CalBioChem, CA, USA), goat anti-platelet derived growth factor receptor- $\alpha$  (PDGFR $\alpha$ , 1:200,  
106 AF1062, R&D Systems, MN, USA), goat anti-Iba1 (1:200, ab5076, Abcam, UK), mouse anti-gial  
107 fibrillary acidic protein (GFAP, 1:100, MA360, Millipore, MA, USA) and rabbit anti-phosphorylated  
108 TrkB<sup>S478</sup> (1:200 R-1718-50, Biosensis).

## 109 **2.4 Electron microscopy and analysis**

110 Semi-thin (0.5-0.1 $\mu$ m) sections of caudal corpus callosum in a sagittal plane were collected on glass  
111 slides and stained with 1% toluidine blue to select region of analysis. Ultrathin (0.1 $\mu$ m) sections were  
112 subsequently collected on 3x3mm copper grids and specimens examined using a JEOL 1001  
113 transmission electron microscope. Images were captured with MegaView III CCD cooled camera  
114 operated with iTEM AnalySIS software (Olympus Soft Imaging Systems GmbH). A minimum of six  
115 distinct fields of view were imaged at 5000 or 10000x magnification for each animal. The proportion  
116 of myelinated axons, axon diameter and g-ratio were analysed manually using FIJI/ImageJ (National  
117 Institutes of Health). For g-ratios at least 100 axons from 3 mice per group were measured. Resin  
118 embedding, sectioning and post-staining and EM imaging were performed at the Peter MacCallum  
119 Centre for Advanced Histology and Microscopy.

## 120 **2.5 Fluorescence imaging and analysis**

121 Imaging was performed blind to treatment group and restricted to the caudal corpus callosum  
122 approximately -1.1 to -3.0mm from Bregma. Tracts contributing to the dorsal hippocampal  
123 commissure were excluded from analysis. For each analysis, a minimum of three sections per animal  
124 were imaged.

125 To quantify the level of remyelination images of MBP stained sections were collected with an  
126 AxioVision Hr camera attached to a Zeiss Axioplan2 epi-fluorescence microscope under a 20x  
127 objective. Uniform exposure times were used. Remaining images were acquired with a Zeiss  
128 LSM780 or LSM880 confocal microscope with 405nm, 488nm, 561nm and 633nm laser lines. For  
129 each fluorescent stain uniform settings were used.

130 MBP staining was measured as described in Fletcher et al. 2014 using the threshold function in  
131 FIJI/Image J and limited to a standard region of interest (ROI) of 625000 $\mu$ m<sup>2</sup> for each section. Data  
132 were expressed as a percentage area of positive staining in a single ROI.

### 133 **2.5.1 Cell counts**

134 All cell counts were performed blind to sample identity, manually in FIJI/Image J. Data were  
135 expressed as the number of cell/mm<sup>2</sup> or proportion out of the total number of nuclei.

## 136 **2.6 Generation of isogenic TrkB expressing Flp-In 293 cells**

137 The Flp-In 293 cell system (ThermoScientific) was used to generate isogenic TrkB expressing  
138 HEK293 cell lines where TrkB was integrated into the host cell genome. Flp-In cells express a  
139 hygromycin resistance gene, which enables the use of hygromycin (50 $\mu$ g/ $\mu$ L) to exert selective  
140 pressure for cells carrying the Flp-In construct.

141 Briefly, to generate the TrkB expressing HEK293 cell line (Figure S1A), Ntrk2 (NM\_012731.2) was  
142 amplified by PCR from rat cDNA and recombined into pDONR201 entry vector by BP clonase II

143 reaction (Invitrogen) according to the manufacturer's instructions. DH5 $\alpha$  bacteria (ThermoScientific)  
144 were transformed with the entry vector by heat shock and positive colonies expressing the  
145 pDONR201 plasmid were selected using kanamycin resistance. pDONR201 plasmid containing  
146 Ntrk2 was purified using a mini-prep kit (Promega) and recombined into pEF5/FRT/V5-DEST  
147 destination vector by LR clonase II reaction (ThermoScientific). Following transformation with the  
148 destination vector, DH5 $\alpha$  bacterial colonies were placed under ampicillin selective pressure and  
149 plasmid DNA extracted. At each step, successful recombination of Ntrk2 into the entry and  
150 destination vectors was confirmed by restriction ligase digest with ApaI (NEB) and Sanger  
151 sequencing (Australian Genome Research Facility).

152 Once the Ntrk2 destination vector was generated, the Flp-In HEK293 host cells were transfected with  
153 the Ntrk2 destination vector and the Flp-recombinase vector pOG44 with 50 $\mu$ g/ $\mu$ L hygromycin  
154 according to the manufacturer's instructions. Flp-In HEK293 cells were maintained at 37°C with 5%  
155 CO<sub>2</sub> in Dulbecco's modified eagle medium (DMEM) with 10% fetal bovine serum, 1% L-glutamine,  
156 1% penicillin and 1% streptomycin. TrkB expression by the isogenic TrkB Flp-In HEK293 cells  
157 was verified by Western blot (Figure S1B-E).

## 158 **2.7 *In vitro* testing of TrkB phosphorylation by LM22A-4**

159 To examine the capacity of LM22A-4 to mimic the BDNF-TrkB signaling cascade, isogenic TrkB  
160 Flp-In HEK293 cells were starved in serum free media for 2 hours before treatment with 4nM BDNF  
161 or 500nM LM22A-4 for 0, 5, 15, 30, 60 and 240mins. Concentrations were chosen based on previous  
162 work (Massa et al., 2010; Wong et al., 2014). Cells were lysed with TNE (Tris) buffer containing  
163 protease (Complete Mini) and phosphatase inhibitors (PhosStop Roche, 50mM Sodium Fluoride).  
164 Protein concentrations were determined by Bradford assay and lysates stored at -80°C until use.

## 165 **2.8 SDS-PAGE and Western blot analysis**

166 Lysates were separated by SDS-PAGE (4-12% Bis-Tris, Invitrogen) and transferred to PVDF  
167 membrane and probed with antibodies against TrkB (1:1000, sc-8316, SantaCruz) and pTrkB<sup>s478</sup>  
168 (1:1000, R-1718-50, Biosensis), p44/42 MAPK (ERK1/2, 1:1000, #9102 Cell Signaling  
169 Technologies) and phosphorylated ERK1/2 (pERK1/2, 1:1000, #9101 Cell Signaling Technologies).  
170 All blots shown are representative of at least 3 independent experiments. Optical density value for  
171 each band was determined using FIJI/ImageJ and corrected to loading control and normalized against  
172 the relevant control condition.

## 173 **2.9 Statistical analyses**

174 Data were analyzed by unpaired t-test, 1-way ANOVA or mixed effect models for repeated measures  
175 (GraphPad Prism 8), to test the effect of TrkB agonist treatments with post-hoc multiple comparisons  
176 as appropriate. Statistical significance was set as p<0.05.

## 177 3 Results

### 178 3.1 LM22A-4 and TDP6 increase myelin sheath thickness during remyelination

179 We have previously shown treatment with TDP6, a structural mimetic of BDNF, enhances the  
180 number of axons remyelinated and increases myelin sheath thickness during recovery after 6-weeks  
181 cuprizone challenge in an oligodendroglial-TrkB dependent manner (Fletcher et al., 2018a). Here, we  
182 compared TDP6 with LM22A-4, a small molecule TrkB agonist reported to be a functional BDNF-  
183 mimetic (Massa et al., 2010). Demyelination by cuprizone feeding was confirmed by myelin basic  
184 protein (MBP) immunostaining, with severely reduced levels of MBP expression observed in animals  
185 taken at 6 weeks of cuprizone feeding (minimum = 2/cohort; Figure S2). Cuprizone feed was  
186 withdrawn and remaining animals received ICV minipumps containing aCSF (artificial cerebrospinal  
187 fluid), TDP6 (40 $\mu$ M) or LM22A-4 (500 $\mu$ M) for 7 days.

188 To examine the extent of remyelination, MBP-immunostaining in the caudal corpus callosum was  
189 assessed. This revealed both TDP6 and LM22A-4 treatment increased ( $p < 0.0001$ ) the percentage area  
190 of MBP<sup>+</sup> staining compared to treatment with the aCSF vehicle (Fig. 1A, quantified in Fig. 1B). EM  
191 analysis indicated that mice treated with TDP6 exhibited a trend increase towards ( $p = 0.09$ ) more  
192 remyelinated axons compared to those receiving aCSF, whereas for those receiving LM22A-4, no  
193 increase was observed ( $p = 0.46$ ; Fig. 1C). Both TDP6 and LM22A-4 treatment resulted in a  
194 significant ( $p = 0.002$ ) reduction in mean g-ratio indicative of increased myelin thickness (Fig. 1D).  
195 Linear regression analysis of g-ratio against axon diameter (Fig. 1E) indicated that although both  
196 TDP6 and LM22A-4 treatments increase myelin sheath thickness during remyelination (Fig. 1D),  
197 TDP6 exerted a more consistent effect with a significant decrease in y-intercept ( $p = 0.0032$ ), but no  
198 change in slope ( $p = 0.35$ ) indicating that g-ratio was reduced across all axonal diameters, whereas for  
199 LM22A-4 there was a significant increase in slope ( $p = 0.006$ ), indicative of reduced g-ratio and  
200 thicker myelin on smaller diameter axons. Collectively, these data are consistent with our previous  
201 findings that BDNF-TrkB signaling increases myelin sheath thickness during remyelination *in vivo*  
202 (Fletcher et al., 2018a).

### 203 3.2 Treatment with LM22A-4 profoundly increases oligodendroglial densities during myelin 204 repair

205 Next, we assessed oligodendroglial populations in the corpus callosum by co-immunostaining Olig2  
206 with PDGFR $\alpha$  and CC1 to identify Olig2<sup>+</sup>PDGFR $\alpha$ <sup>+</sup> oligodendrocyte progenitor cells (OPCs),  
207 Olig2<sup>+</sup>CC1<sup>+</sup> post-mitotic oligodendrocytes and an Olig2<sup>+</sup>PDGFR $\alpha$ <sup>-</sup>CC1<sup>-</sup> intermediate  
208 oligodendroglial population (Fig. 2A). Counts in the caudal corpus callosum revealed TDP6 and  
209 LM22A-4 increased the total population of Olig2<sup>+</sup> oligodendroglia compared to treatment with aCSF  
210 vehicle (Fig. 2B,  $p < 0.0001$ ). Interestingly, LM22A-4 treatment exerted a more profound effect,  
211 increasing the density of Olig2<sup>+</sup> oligodendroglia above TDP6 (Fig. 2B,  $p = 0.0001$ ). Both TDP6 and  
212 LM22A-4 treatments increased the density of Olig2<sup>+</sup>CC1<sup>+</sup> post-mitotic oligodendrocytes compared  
213 to aCSF vehicle (Fig. 2D,  $p = 0.013$ ), consistent with the pro-differentiation effect of TrkB activation  
214 on oligodendroglia. However, assessment of Olig2<sup>+</sup>PDGFR $\alpha$ <sup>+</sup> OPCs indicated LM22A-4 also  
215 increased the density of OPCs compared to treatment with TDP6 or aCSF vehicle (Fig. 2C,  $p = 0.011$ ).  
216 Overall, these data suggest that selectively targeting TrkB during remyelination primarily enhances  
217 oligodendroglial differentiation.

218 To examine whether these effects of LM22A-4 and TDP6 were due to alterations in lineage  
219 progression during differentiation, the proportion of Olig2<sup>+</sup>PDGFR $\alpha$ <sup>+</sup>, Olig2<sup>+</sup>CC1<sup>+</sup> and Olig2<sup>+</sup> only  
220 cells out of the total Olig2<sup>+</sup> population were assessed (Fig. 2E). The proportion of cells that were

221 OPCs or post-mitotic oligodendrocytes were unchanged between groups. However, LM22A-4  
222 treatment significantly increased the proportion of Olig2<sup>+</sup> only cells (26±7%) compared to treatment  
223 with either TDP6 (6±8%) or aCSF vehicle (10±7%) (Fig 2E, mean ± SD, p<0.0001,  $\chi^2$  distribution  
224 test). These data suggest LM22A-4 treatment may exert a greater effect than TDP6 to increase the  
225 proliferation or survival of oligodendroglia during myelin repair.

### 226 **3.3 TrkB phosphorylation in the corpus callosum is elevated following treatment with TDP6** 227 **and LM22A-4 during remyelination**

228 To determine if TDP6 and LM22A-4 infusions stimulated TrkB phosphorylation on oligodendroglia  
229 we performed triple immunolabelling for pTrkB<sup>S478</sup> with PDGFR $\alpha$  and CC1 to identify OPCs and  
230 post-mitotic oligodendrocytes, respectively (Fig. 3A). This revealed that TDP6 and LM22A-4  
231 infusions were successful, with an increased proportion of pTrkB<sup>S478+</sup> cells in the corpus callosum  
232 during remyelination, compared to the aCSF vehicle (Fig. 3B, p=0.0022). Assessment of the  
233 proportion of pTrkB<sup>S478+</sup> cells positive for the OPC marker PDGFR $\alpha$  indicated treatment with TDP6  
234 and LM22A-4 had no effect on TrkB activation on OPCs (Fig. 3C, p=0.21). However, the proportion  
235 of TrkB<sup>S478+</sup>CC1<sup>+</sup> post-mitotic oligodendrocytes increased with TDP6 treatment compared to  
236 treatment with LM22A-4 (Fig. 3D, p=0.046). These data suggest that LM22A-A can signal *via* TrkB  
237 during remyelination *in vivo* and is consistent with previous findings that TDP6 stimulates TrkB  
238 phosphorylation on CC1<sup>+</sup> oligodendrocytes.

### 239 **3.4 LM22A-4 mediated increases in myelin sheath thickness and oligodendroglial densities** 240 **require oligodendrocyte TrkB expression**

241 To determine whether the effects of LM22A-4 on myelin sheath thickness and oligodendrocyte  
242 populations during myelin repair are dependent on oligodendroglial TrkB expression, we repeated  
243 the infusion experiment in CNPaseCre<sup>+/+</sup> x TrkB<sup>fl/fl</sup> mice in which TrkB is genetically deleted from  
244 maturing oligodendrocytes. These mice have a 3-fold reduction in TrkB<sup>+</sup> oligodendroglia but adult  
245 myelination and oligodendrocyte populations are unaffected (Fletcher et al., 2018a). Cuprizone was  
246 administered for 6 weeks, and LM22A-4 or aCSF vehicle was infused via ICV minipumps for 7 days.  
247 Immunostaining for MBP revealed that LM22A-4 treatment in the oligodendroglial TrkB knockout  
248 mice had no effect on the percentage area of MBP<sup>+</sup> immunostaining compared to the aCSF vehicle  
249 (Fig. 4A, quantified in Fig. 4B, p=0.21). Similarly, EM analysis (Fig. 4D) revealed there was no  
250 change in the proportion of axons myelinated with LM22A-4 treatment (Fig. 4C, p=0.85) or the  
251 mean g-ratio (aCSF: 0.77 ± 0.087; LM22A-4: 0.78 ± 0.088, p=0.90, n=3-4/group, unpaired t-test).  
252 These data are consistent with oligodendroglial TrkB expression being necessary for LM22A-4 to  
253 increase myelin sheath thickness during remyelination.

254 To determine if LM22A-4 treatment increased oligodendroglial populations during remyelination in  
255 oligodendroglial TrkB knockout mice, triple immunolabelling for Olig2-PDGFR $\alpha$ -CC1 was  
256 performed in the contralateral caudal corpus callosum (Fig. 5A). Counts revealed that LM22A-4  
257 treatment had exerted no change in the density of Olig2<sup>+</sup> oligodendroglia (p=0.91; Fig. 5B),  
258 Olig2<sup>+</sup>PDGFR $\alpha$ <sup>+</sup> OPCs (p=0.38; Fig 5C) or Olig2<sup>+</sup>CC1<sup>+</sup> post-mitotic oligodendrocytes (p=0.94; Fig.  
259 5D) compared to the aCSF vehicle. Similarly, there was no difference in the proportion of Olig2<sup>+</sup>  
260 only cells between aCSF vehicle and LM22A-4 treatment in the oligodendroglial TrkB knockout  
261 mice (Fig. 5E, p=0.33,  $\chi^2$  distribution test). Collectively, these data confirm that the action of  
262 LM22A-4 in increasing oligodendroglial populations is dependent on oligodendroglial expressed  
263 TrkB.



264 To examine TrkB phosphorylation in LM22A-4 treated oligodendroglial TrkB knockout mice,  
265 immunohistochemistry for pTrkB<sup>S478</sup> with oligodendrocyte markers PDGFR $\alpha$  and CC1 was  
266 performed (Fig. 6A). Analysis of the caudal corpus callosum revealed that in the oligodendroglial  
267 TrkB knockout mice LM22A-4 treatment did not increase the proportion of pTrkB<sup>S478+</sup> cells  
268 compared to the aCSF vehicle (Fig. 6B,  $p=0.24$ ). This was also reflected with no change in the  
269 proportion of pTrkB<sup>S478+</sup> cells positive for oligodendroglial markers PDGFR $\alpha$  ( $p=0.99$ ; Fig. 6C) or  
270 CC1 ( $p>0.99$ ; Fig. 6D). These data indicate that for LM22A-4 mediated TrkB phosphorylation during  
271 remyelination requires oligodendroglial TrkB expression.

### 272 3.5 TrkB signaling dynamics initiated by LM22A-4 do not mimic BDNF

273 To determine if LM22A-4 elicits a signaling cascade mimicking typical BDNF-TrkB signaling, we  
274 generated an isogenic stable TrkB expressing HEK293 (293-TrkB) cell line using the Flp-In system  
275 (Supplementary Fig. 1A). TrkB expression in the 293-TrkB cells was confirmed by Western blot and  
276 compared to TrkB expression generated by transiently transfecting Flp-In HEK293 cells with the  
277 Ntrk2 expression vector. This revealed that transiently transfected cells overexpress both mature  
278 glycosylated and unprocessed TrkB receptors, whereas the 293-TrkB cells express only the fully  
279 mature glycosylated form (Supplementary Fig. 1B). To confirm that the 293-TrkB cells responded to  
280 BDNF, cells were treated with BDNF (0.04nM to 40nM) for 15 mins (Supplementary Fig. 1C) which  
281 resulted in increasing levels of TrkB and ERK1/2 phosphorylation (Supplementary Fig. 1D).

282 As determined in the original report characterizing LM22A-4 as functional BDNF mimetic (Massa et  
283 al., 2010), we used 500nM as the standard concentration for our *in vitro* studies. The 293-TrkB cells  
284 were treated with 4nM BDNF or 500nM LM22A-4 for a time course of 5, 15, 30, 60 and 240mins  
285 and assessed for TrkB and ERK1/2 phosphorylation by Western blot (Fig. 7A). Densitometric  
286 analysis (Fig. 7B) revealed that compared to BDNF treatment, which increased TrkB  
287 phosphorylation within 5mins ( $p=0.012$ ), LM22A-4 did not significantly increase levels of  
288 phosphorylated TrkB until 240mins of treatment ( $p=0.02$ ). The effects of LM22A-4 treatment on  
289 ERK1/2 phosphorylation where levels peaked at 5mins of treatment, and significantly declined  
290 compared to BDNF from 15 to 240mins (Fig. 7C). Collectively, these data indicate that LM22A-4  
291 does not elicit a signaling cascade that mimics typical BDNF-TrkB signaling, in particular suggesting  
292 that pERK1/2 is upstream of TrkB phosphorylation in the pathway stimulated by LM22A-4.

## 293 4 Discussion

294 There is an unmet clinical need for therapies that promote myelin repair to halt disease progression in  
295 MS. Here, we have shown that targeting oligodendroglial TrkB activation during remyelination  
296 increases post-mitotic oligodendrocyte density and myelin sheath thickness. By comparing TDP6, a  
297 structural peptide mimic of the Loop 2 region of BDNF, and LM22A-4, a small molecule TrkB  
298 agonist we have identified that while both promote myelin repair, they exert disparate effects upon  
299 OPCs and intermediate oligodendroglial populations. The effects of both TDP6 and LM22A-4 are  
300 dependent on the expression of oligodendroglial TrkB, indicating that while these two molecules  
301 putatively activate the same receptor, they may result in biased or differential signaling within  
302 oligodendroglia, as indicated by the differences in remyelination profile and progression of  
303 oligodendrocyte differentiation. This may reflect our *in vitro* analysis comparing the effect of  
304 LM22A-4 and BDNF upon TrkB and ERK1/2 phosphorylation which demonstrates that LM22A-4  
305 activates BDNF-TrkB signaling pathways with substantially different kinetics and magnitude,  
306 compared to BDNF. Importantly, use of the oligodendroglial TrkB knockout mice to test its  
307 therapeutic efficacy provides the first *in vivo* genetic evidence that LM22A-4 action requires the

308 presence of TrkB, although our data suggests that the mode of TrkB activation may differ to what  
309 was previously appreciated.

310 For decades the therapeutic promise of BDNF-TrkB signaling as a treatment for neurodegenerative  
311 and demyelination conditions has been recognized (Fletcher et al., 2018a; Longo and Massa, 2013;  
312 McTigue et al., 1998). However, the poor pharmacokinetic properties of BDNF have led to focused  
313 development of BDNF mimetics and small molecule TrkB agonists, including TDP6 and LM22A-4  
314 among others (Boltaev et al., 2017; Longo and Massa, 2013). Previously, we showed that the  
315 structural BDNF-mimetic TDP6 enhances remyelination, increasing the proportion of axons  
316 remyelinated, and density of post-mitotic oligodendrocytes compared to treatment with the vehicle  
317 and BDNF (Fletcher et al., 2018a). We found that LM22A-4 increased oligodendroglial density to a  
318 greater degree than TDP6, but instead of solely affecting maturing cells, LM22A-4 also increased  
319 OPC density. Both these effects were dependent on oligodendroglial TrkB expression. This raises the  
320 ongoing, unresolved question of whether oligodendroglial TrkB signaling exerts a direct influence on  
321 oligodendroglial proliferation and survival during remyelination, in addition to its well-established  
322 pro-differentiation effect (Fletcher et al., 2018a; Goebbels et al., 2017; Xiao et al., 2011). Previous  
323 studies in the BDNF heterozygous global knockout mice showed that oligodendroglial populations  
324 are sensitive to low BDNF levels during cuprizone demyelination, with reduced proliferating OPCs  
325 and subsequently differentiated oligodendrocytes (Tsiperson et al., 2015; VonDran et al., 2011). This  
326 appears to contrast our observations, where exogenous BDNF or TDP6 exerted no effect on the  
327 density or proliferative fraction of OPCs during remyelination after cuprizone (Fletcher et al., 2018a).  
328 The different observations between these two distinct experimental approaches may ultimately reflect  
329 context, wherein oligodendroglia subjected to a lifetime of BDNF haploinsufficiency simply behave  
330 differently.

331 The selective influence that LM22A-4 exerted upon OPCs remains to be explained. The doses used  
332 for TDP6 and LM22A-4 were determined from reported concentrations required for these  
333 compounds to mimic the neurotrophic activity of BDNF in *in vitro* myelinating co-culture or  
334 neuronal survival assays (Massa et al., 2010; O'Leary and Hughes, 2003; Wong et al., 2014). TDP6,  
335 like BDNF, demonstrates a strong signaling bias for MAPK/ERK in oligodendrocytes (Du et al.,  
336 2006; Wong et al., 2014; Xiao et al., 2011). In contrast, a recent report in a rat traumatic  
337 epileptogenesis model indicates LM22A-4 may demonstrate bias towards PI3K/Akt signaling (Gu et  
338 al., 2018). The PI3K/Akt and MAPK/ERK signaling pathways are known to act independently and  
339 cooperatively in oligodendrocytes to regulate distinct stages of oligodendrocyte myelination (Dai et  
340 al., 2014; Ishii et al., 2019) and PI3K/Akt signaling has been identified as necessary for OPC survival  
341 *in vitro* (Ebner et al., 2000; Ness et al., 2002). The potential signal bias towards PI3K/Akt over  
342 MAPK/ERK may explain why LM22A-4 elicited an increase in OPCs, as well as the anticipated  
343 increase in post-mitotic oligodendrocyte densities.

344 Both TDP6 and LM22A-4 infusion increased myelin sheath thickness in a manner dependent on  
345 oligodendroglial TrkB expression, consistent with the demonstrated effects of TrkB signaling *via*  
346 MAPK/ERK in oligodendrocytes to promote myelin sheath growth (Ishii et al., 2012, 2016). It also  
347 confirms our previous findings where infusion of exogenous BDNF or TDP6 increased myelin sheath  
348 thickness during remyelination (Fletcher et al., 2018a). Intriguingly, LM22A-4 exerted its effect on  
349 myelin thickness almost selectively on smaller diameter axons, which was completely abrogated in  
350 the oligodendroglial TrkB knockout mice. This contrasts with TDP6, and our previous findings with  
351 BDNF (Fletcher et al., 2018a), where myelin sheath thickness increased across all axonal diameters.  
352 However, it echoes our findings that TDP6 treatment in oligodendroglial TrkB knockout mice  
353 resulted in increased myelination of small diameter axons during myelin repair (Fletcher et al.,

354 2018a). It is tempting to speculate that small diameter axons are exerting a selective effect in both  
355 instances, but it is critical to distinguish growth in myelin thickness as an oligodendrocyte-driven  
356 function (Ishii et al., 2012). To date, a direct axonal signal that instructs oligodendrocytes to increase  
357 myelin thickness has not been identified, although the number of myelin wraps is known to increase  
358 as circuit activity increases with the maturing brain (Sturrock, 1980). In contrast, initiation of  
359 myelination, particularly for small diameter axons is known to require axonally derived signals  
360 (Bechler et al., 2017; Gautier et al., 2015), suggestive that TrkB expression by neurons may  
361 potentially confer a pro-myelinating signal to oligodendrocytes.

362 Concerningly, a recent report indicates that LM22A-4 does not activate TrkB at all (Boltaev et al.,  
363 2017). The fact that LM22A-4 failed to promote remyelination and increase oligodendroglial density  
364 in the oligodendrocyte TrkB knockout mice clearly indicates TrkB is necessary for the action of  
365 LM22A-4 and this is the first *in vivo* genetic evidence that LM22A-4 requires TrkB for activity.  
366 Although LM22A-4 may exert its effect through direct activity on TrkB, our data and findings by  
367 Boltaev et al. (2017) raise the possibility that LM22A-4 is exerting an indirect effect, potentially by  
368 increasing BDNF or NT-4 expression in the demyelinated lesion. This is a possibility we certainly  
369 cannot discount. It is important to note, however, that Boltaev et al. (2017) used a model system of  
370 cortical cultures to assess TrkB activation. Our observations in the 293-TrkB cells identified that  
371 LM22A-4 produced a spike of ERK1/2 phosphorylation after 5mins independent of any evidence of  
372 TrkB phosphorylation, but then identified TrkB phosphorylation after 4 hours of LM22A-4 exposure.  
373 This supports a model in which TrkB activation is an event downstream of LM22A-4 activity at  
374 another receptor, although this also contrasts with findings from the original report wherein TrkB  
375 phosphorylation was detected in cultured hippocampal neurons within 60mins (Massa et al., 2010).  
376 Notably, ERK1/2 phosphorylation was detected in these cultures within 10mins (Massa et al., 2010).  
377 Whilst 293-TrkB cells and the two types of neuronal cultures are contextually quite different cells,  
378 Boltaev et al. (2017) limited LM22A-4 treatment to 2 hours, potentially missing this delayed  
379 response. Such a delay in Trk phosphorylation has been reported previously (Lee and Chao, 2001)  
380 and is a pattern consistent with Trk-receptor transactivation.

381 The extended 4-hour timeframe required to detect TrkB phosphorylation following LM22A-4  
382 treatment *in vitro* is consistent with Trk-receptor transactivation, where it can take up to 6 hours to  
383 elicit detectable Trk receptor phosphorylation, and results in signal bias towards Akt (Lee and Chao,  
384 2001). We propose that LM22A-4 mediates its increase in OPC density during remyelination by  
385 Trk-transactivation potentially *via* GPCRs (Fig. 8). Multiple GPCRs are known to be critical for OPC  
386 proliferation and regulating OPC differentiation towards myelination (Chen et al., 2009; Giera et al.,  
387 2015; Yang et al., 2016). In our model, we hypothesise that LM22A-4 acts *via* unidentified GPCRs  
388 which engage Src-family kinases, most likely Fyn in oligodendrocytes; this results in intracellular  
389 phosphorylation of TrkB receptors confined in transport vesicles and not expressed at the cell surface  
390 (Fig. 8). This could be tested *in vitro* with LM22A-4 treated TrkB-293 cells or primary  
391 oligodendrocytes co-treated with Src inhibitors. Full understanding of the mode of action for  
392 LM22A-4 is warranted in order to optimize its therapeutic potential. Overall, our hypothesised mode  
393 of action for LM22A-4 is parsimonious with known roles of Src-family kinases / Fyn in Trk-  
394 transactivation (Rajagopal et al., 2004; Rajagopal and Chao, 2006) and oligodendroglial function  
395 (Cognato et al., 2004; Peckham et al., 2016; Sperber et al., 2001), as well as our current findings of  
396 delayed TrkB phosphorylation *in vitro* and TrkB-dependent remyelination outcomes *in vivo*.

397 We have demonstrated targeting TrkB activation on oligodendrocytes either *via* a peptide mimetic or  
398 small molecule partial agonist, enhances myelin repair after a central demyelinating insult by  
399 increasing the density of post-mitotic oligodendrocytes and increasing myelin sheath thickness. By

400 directly comparing these two strategies we have also provided necessary insight on the recent  
401 controversies about the fidelity of small molecule TrkB agonists. Through *in vivo* genetic deletion of  
402 oligodendroglial TrkB we have shown LM22A-4 is dependent on TrkB receptor expression for its  
403 effects on increasing oligodendroglial populations and myelin thickness, while our *in vitro* studies  
404 have shown that LM22A-4 acts in delayed manner, potentially through GPCR-mediated TrkB  
405 transactivation. Overall, our results further verify that targeting TrkB with small molecule mimetics  
406 is a viable therapeutic strategy to promote myelin repair in central demyelinating diseases, such as  
407 MS.

## 408 **5 Conflict of Interest**

409 The authors declare that the research was conducted in the absence of any commercial or financial  
410 relationships that could be construed as a potential conflict of interest.

## 411 **6 Contribution to the Field Statement**

412 Multiple sclerosis (MS) is caused by autoimmune attack against the myelin sheath that results in  
413 sensorimotor, cognitive and psychosocial dysfunction. Critically, the brain's innate capacity for  
414 myelin repair is also impaired in MS, contributing to chronic axonal damage and nerve cell death. To  
415 stop disease progression, there is an urgent unmet clinical need for remyelinating therapies. Here, we  
416 evaluate two strategies to mimic the pro-myelinating effect of brain-derived neurotrophic factor  
417 (BDNF) by targeting its TrkB receptor on myelin producing cells in a preclinical model of MS. We  
418 show that both a structural peptide-mimetic and a small molecule TrkB agonist enhance myelin  
419 repair, after a demyelinating insult by increasing the density of myelinating cells and increasing  
420 myelin sheath thickness. Importantly, we also resolve outstanding issues in the field regarding the  
421 fidelity of partial TrkB agonist, LM22A-4. We show that the *in vivo* effects on myelin repair  
422 mediated by LM22A-4 are dependent on oligodendrocyte expressed TrkB. However, the timeframe  
423 required for TrkB phosphorylation to occur is extended and reminiscent of Trk-receptor  
424 transactivation. Overall, our findings shed light on LM22A-4 mechanism of action and provide  
425 support for targeting TrkB activation as a therapeutic to promote myelin repair in central  
426 demyelinating disease.

## 427 **7 Author Contributions**

428 JF, JX and SM conceived and designed the study. JF, HN, RW, AP and SM performed experiments.  
429 JF, HN and SF analysed data. SF provided reagents/analytic tools. JF wrote the first draft. JF, HN,  
430 SF, JX and SM reviewed and revised the manuscript. All authors read, revised and approved the  
431 submitted version.

## 432 **8 Funding**

433 This work was supported by Australian National Health and Medical Research Council (NHMRC)  
434 Project Grants to JX (APP1058647) and SM (APP1105108). SF is an Australian Research Council  
435 Future Fellow. JF was supported by Multiple Sclerosis Research Australia (14-056) and Melbourne  
436 Neuroscience Institute (2018) Research Fellowships.

## 437 **9 Acknowledgments**

438 The authors acknowledge the staff and facilities of the Biological Optical Microscope Platform, The  
439 University of Melbourne and the Centre for Advanced Microscopy and Histology, Peter MacCallum  
440 Centre.

## 441 **10 Supplementary Material**

442 Supplementary Figure 1. Generation of isogenic TrkB expressing Flp-In HEK293 (TrkB-293) cells

443 Supplementary Figure 2: MBP immunostaining to confirm successful demyelination with 6 weeks'  
444 cuprizone feeding

## 445 **11 Data Availability Statement**

446 The raw data supporting the conclusions of this manuscript will be made available by the authors,  
447 without undue reservation, to any qualified researcher.

## 448 **12 References**

- 449 Bechler, M. E., Swire, M., and Ffrench-Constant, C. (2017). Intrinsic and adaptive myelination -- a  
450 sequential mechanism for smart wiring in the brain. *Dev. Neurobiol.*, 1–43. doi:10.1002/dneu.
- 451 Boltaev, U., Meyer, Y., Tolibzoda, F., Jacques, T., Gassaway, M., Xu, Q., et al. (2017). Multiplex  
452 quantitative assays indicate a need for re-evaluating reported small-molecule TrkB agonists.  
453 1670.
- 454 Chao, M. V (2003). Neurotrophins and their receptors: a convergence point for many signalling  
455 pathways. *Nat. Rev. Neurosci.* 4, 299–309. doi:10.1038/nrn1078.
- 456 Chen, Y., Wu, H., Wang, S., Koito, H., Li, J., Ye, F., et al. (2009). The oligodendrocyte-specific G  
457 protein-coupled receptor GPR17 is a cell-intrinsic timer of myelination. *Nat. Neurosci.* 12,  
458 1398–1406. doi:10.1038/nn.2410.
- 459 Colognato, H., Ramachandrapa, S., Olsen, I. M., and ffrench-Constant, C. (2004). Integrins direct  
460 Src family kinases to regulate distinct phases of oligodendrocyte development. *J. Cell Biol.* 167,  
461 365–375. doi:10.1083/jcb.200404076.
- 462 Dai, J., Bercury, K. K., and Macklin, W. B. (2014). Interaction of mTOR and Erk1/2 signaling to  
463 regulate oligodendrocyte differentiation. *Glia* 62, 2096–2109. doi:10.1002/glia.22729.
- 464 Du, Y. ;, Fischer, T. Z., Lee, L. N., Lercher, L. D., and Dreyfus, C. F. (2003). Regionally Specific  
465 Effects of BDNF on Oligodendrocytes. *Dev. Neurosci. Mar-Aug 25*, 2–4. Available at:  
466 <http://search.proquest.com.ezp.lib.unimelb.edu.au/docview/221154098?accountid=12372>  
467 [Accessed April 3, 2017].
- 468 Du, Y., Lercher, L. D., Zhou, R., and Dreyfus, C. F. (2006). Mitogen-activated protein kinase  
469 pathway mediates effects of brain-derived neurotrophic factor on differentiation of basal  
470 forebrain oligodendrocytes. *J. Neurosci. Res.* 84, 1692–1702. doi:10.1002/jnr.21080.
- 471 Ebner, S., Dunbar, M., and McKinnon, R. D. (2000). Distinct roles for PI3K in proliferation and  
472 survival of oligodendrocyte progenitor cells. *J. Neurosci. Res.* 62, 336–345. doi:10.1002/1097-  
473 4547(20001101)62:3<336::AID-JNR3>3.0.CO;2-H.
- 474 Fletcher, J. L., Wood, R. J., Nguyen, J., Norman, X. E. M. L., Jun, C. M. K., Prawdiuk, A. R., et al.  
475 (2018a). Targeting TrkB with a Brain-Derived Neurotrophic Factor Mimetic Promotes Myelin  
476 Repair in the Brain. 38, 7088–7099. doi:10.1523/JNEUROSCI.0487-18.2018.
- 477 Fletcher, J., Murray, S., Xiao, J., Fletcher, J. L., Murray, S. S., and Xiao, J. (2018b). Brain-Derived  
478 Neurotrophic Factor in Central Nervous System Myelination: A New Mechanism to Promote  
479 Myelin Plasticity and Repair. *Int. J. Mol. Sci.* 19, 4131. doi:10.3390/ijms19124131.
- 480 Gautier, H. O. B., Evans, K. A., Volbracht, K., James, R., Sitnikov, S., Lundgaard, I., et al. (2015).

- 481 Neuronal activity regulates remyelination via glutamate signalling to oligodendrocyte  
482 progenitors. *Nat. Commun.* 6, 8518. doi:10.1038/ncomms9518.
- 483 Giera, S., Deng, Y., Luo, R., Ackerman, S. D., Mogha, A., Monk, K. R., et al. (2015). The adhesion  
484 G protein-coupled receptor GPR56 is a cell-autonomous regulator of oligodendrocyte  
485 development. *Nat. Commun.* 6, 6121. doi:10.1038/ncomms7121.
- 486 Goebbels, S., Wieser, G. L., Pieper, A., Spitzer, S., Weege, B., Yan, K., et al. (2017). A neuronal  
487 PI(3,4,5)P3-dependent program of oligodendrocyte precursor recruitment and myelination. *Nat.*  
488 *Neurosci.* 20, 10–15. doi:10.1038/nn.4425.
- 489 Gu, F., Parada, I., Yang, T., Longo, F. M., and Prince, D. A. (2018). Partial TrkB receptor activation  
490 suppresses cortical epileptogenesis through actions on parvalbumin interneurons. *Neurobiol.*  
491 *Dis.* 113, 45–58. doi:10.1016/j.nbd.2018.01.018.
- 492 Han, J., Pollak, J., Yang, T., Siddiqui, M. R., Doyle, K. P., Taravosh-Lahn, K., et al. (2012). Delayed  
493 administration of a small molecule tropomyosin-related kinase B ligand promotes recovery after  
494 hypoxic-ischemic stroke. *Stroke* 43, 1918–1924. doi:10.1161/STROKEAHA.111.641878.
- 495 Ishii, A., Furusho, M., Dupree, J. L., and Bansal, R. (2016). Strength of ERK1/2 MAPK Activation  
496 Determines Its Effect on Myelin and Axonal Integrity in the Adult CNS. *J. Neurosci.* 36, 6471–  
497 87. doi:10.1523/JNEUROSCI.0299-16.2016.
- 498 Ishii, A., Furusho, M., Macklin, W., and Bansal, R. (2019). Independent and cooperative roles of the  
499 Mek/ERK1/2-MAPK and PI3K/Akt/mTOR pathways during developmental myelination and in  
500 adulthood. *Glia.* doi:10.1002/glia.23602.
- 501 Ishii, A., Fyffe-Maricich, S. L., Furusho, M., Miller, R. H., and Bansal, R. (2012). ERK1/ERK2  
502 MAPK signaling is required to increase myelin thickness independent of oligodendrocyte  
503 differentiation and initiation of myelination. *J. Neurosci.* 32, 8855–64.  
504 doi:10.1523/JNEUROSCI.0137-12.2012.
- 505 Lappe-Siefke, C., Goebbels, S., Gravel, M., Nicksch, E., Lee, J., Braun, P., et al. (2003). Disruption  
506 of *Cnp1* uncouples oligodendroglial functions in axonal support and myelination. *Nat. Genet.*  
507 33, 366–374.
- 508 Lee, F. S., and Chao, M. V (2001). Activation of Trk neurotrophin receptors in the absence of  
509 neurotrophins. *Proc. Natl. Acad. Sci. U. S. A.* 98, 3555–60. doi:10.1073/pnas.061020198.
- 510 Longo, F. M., and Massa, S. M. (2013). Small-molecule modulation of neurotrophin receptors: a  
511 strategy for the treatment of neurological disease. *Nat. Rev. Drug Discov.* 12, 507–525.  
512 doi:10.1038/nrd4024.
- 513 Lulkart, B., Net, S., Vimani, T., Lush, M., Liu, Y., Kavalali, E., et al. (2005). TrkB has a cell-  
514 autonomous role in the establishment of hippocampal Schaffer collateral synapses. *J Neurosci*  
515 25, 3774–66.
- 516 Massa, S. M., Yang, T., Xie, Y., Shi, J., Bilgen, M., Joyce, J. N., et al. (2010). Small molecule BDNF  
517 mimetics activate TrkB signaling and prevent neuronal degeneration in rodents. *J. Clin. Invest.*  
518 120, 1774–1785. doi:10.1172/JCI41356.

- 519 McTigue, D. M., Horner, P. J., Stokes, B. T., and Gage, F. H. (1998). Neurotrophin-3 and brain-  
520 derived neurotrophic factor induce oligodendrocyte proliferation and myelination of  
521 regenerating axons in the contused adult rat spinal cord. *J. Neurosci.* 18, 5354–5365.
- 522 Ness, J. K., Mitchell, N. E., and Wood, T. L. (2002). IGF-I and NT-3 Signaling Pathways in  
523 Developing Oligodendrocytes: Differential Regulation and Activation of Receptors and the  
524 Downstream Effector Akt. *Dev. Neurosci.* 24, 437–445. doi:10.1159/000069050.
- 525 O’Leary, P. D., and Hughes, R. A. (2003). Design of potent peptide mimetics of brain-derived  
526 neurotrophic factor. *J. Biol. Chem.* 278, 25738–25744. doi:10.1074/jbc.M303209200.
- 527 Peckham, H., Giuffrida, L., Wood, R., Gonsalvez, D., Ferner, A., Kilpatrick, T. J., et al. (2016). Fyn  
528 is an intermediate kinase that BDNF utilizes to promote oligodendrocyte myelination. *Glia* 64,  
529 255–269. doi:10.1002/glia.22927.
- 530 Poduslo, J. F., and Curran, G. L. (1996). MOLECULAR Permeability at the blood-brain and blood-  
531 nerve barriers of the. 36.
- 532 Rajagopal, R., and Chao, M. V. (2006). A role for Fyn in Trk receptor transactivation by G-protein-  
533 coupled receptor signaling. *Mol. Cell. Neurosci.* 33, 36–46. doi:10.1016/j.mcn.2006.06.002.
- 534 Rajagopal, R., Chen, Z.-Y., Lee, F. S., and Chao, M. V (2004). Transactivation of Trk Neurotrophin  
535 Receptors by G-Protein-Coupled Receptor Ligands Occurs on Intracellular Membranes. *J.*  
536 *Neurosci.* 24, 6650–6658. doi:10.1523/JNEUROSCI.0010-04.2004.
- 537 Schmid, D. a, Yang, T., Ogier, M., Adams, I., Mirakhur, Y., Wang, Q., et al. (2012). A TrkB small  
538 molecule partial agonist rescues TrkB phosphorylation deficits and improves respiratory  
539 function in a mouse model of Rett syndrome. *J. Neurosci.* 32, 1803–10.  
540 doi:10.1523/JNEUROSCI.0865-11.2012.
- 541 Simmons, D. a, Belichenko, N. P., Yang, T., Condon, C., Monbureau, M., Shamloo, M., et al. (2013).  
542 A small molecule TrkB ligand reduces motor impairment and neuropathology in R6/2 and  
543 BACHD mouse models of Huntington’s disease. *J. Neurosci.* 33, 18712–27.  
544 doi:10.1523/JNEUROSCI.1310-13.2013.
- 545 Sperber, B. R., Boyle-Walsh, E. A., Engleka, M. J., Gadue, P., Peterson, A. C., Stein, P. L., et al.  
546 (2001). A unique role for Fyn in CNS myelination. *J. Neurosci.* 21, 2039–47. Available at:  
547 <http://www.ncbi.nlm.nih.gov/pubmed/11245687> [Accessed November 14, 2018].
- 548 Sturrock, R. R. (1980). MYELINATION OF THE MOUSE CORPUS CALLOSUM Introduction In  
549 earlier studies the process of myelination was examined in the rostral part of the anterior limb  
550 of the anterior commissure ( Sturrock , 1975 ) and the commis- Results The mean diameter of  
551 unmyelina. 415–420.
- 552 Tshiperson, V., Huang, Y., Bagayogo, I., Song, Y., VonDran, M. W., DiCicco-Bloom, E., et al.  
553 (2015). Brain-Derived Neurotrophic Factor Deficiency Restricts Proliferation of  
554 Oligodendrocyte Progenitors Following Cuprizone-Induced Demyelination. *ASN Neuro* 7.  
555 doi:10.1177/1759091414566878.
- 556 VonDran, M. W., Singh, H., Honeywell, J. Z., and Dreyfus, C. F. (2011). Levels of BDNF impact



- 557 oligodendrocyte lineage cells following a cuprizone lesion. *J. Neurosci.* 31, 14182–90.  
558 doi:10.1523/JNEUROSCI.6595-10.2011.
- 559 Wong, A. W., Giuffrida, L., Wood, R., Peckham, H., Gonsalvez, D., Murray, S. S., et al. (2014).  
560 TDP6, a brain-derived neurotrophic factor-based trkB peptide mimetic, promotes  
561 oligodendrocyte myelination. *Mol. Cell. Neurosci.* 63, 132–140.  
562 doi:10.1016/j.mcn.2014.10.002.
- 563 Wong, A. W., Xiao, J., Kemper, D., Kilpatrick, T. J., and Murray, S. S. (2013). Oligodendroglial  
564 expression of TrkB independently regulates myelination and progenitor cell proliferation. *J.*  
565 *Neurosci.* 33, 4947–57. doi:10.1523/JNEUROSCI.3990-12.2013.
- 566 Xiao, J., Wong, A. W., Willingham, M. M., Van Den Buuse, M., Kilpatrick, T. J., and Murray, S. S.  
567 (2011). Brain-derived neurotrophic factor promotes central nervous system myelination via a  
568 direct effect upon oligodendrocytes. *NeuroSignals* 18, 186–202. doi:10.1159/000323170.
- 569 Yang, H.-J., Vainshtein, A., Maik-Rachline, G., and Peles, E. (2016). G protein-coupled receptor 37  
570 is a negative regulator of oligodendrocyte differentiation and myelination. *Nat. Commun.* 7,  
571 10884. doi:10.1038/ncomms10884.
- 572
- 573

574 13 Figures

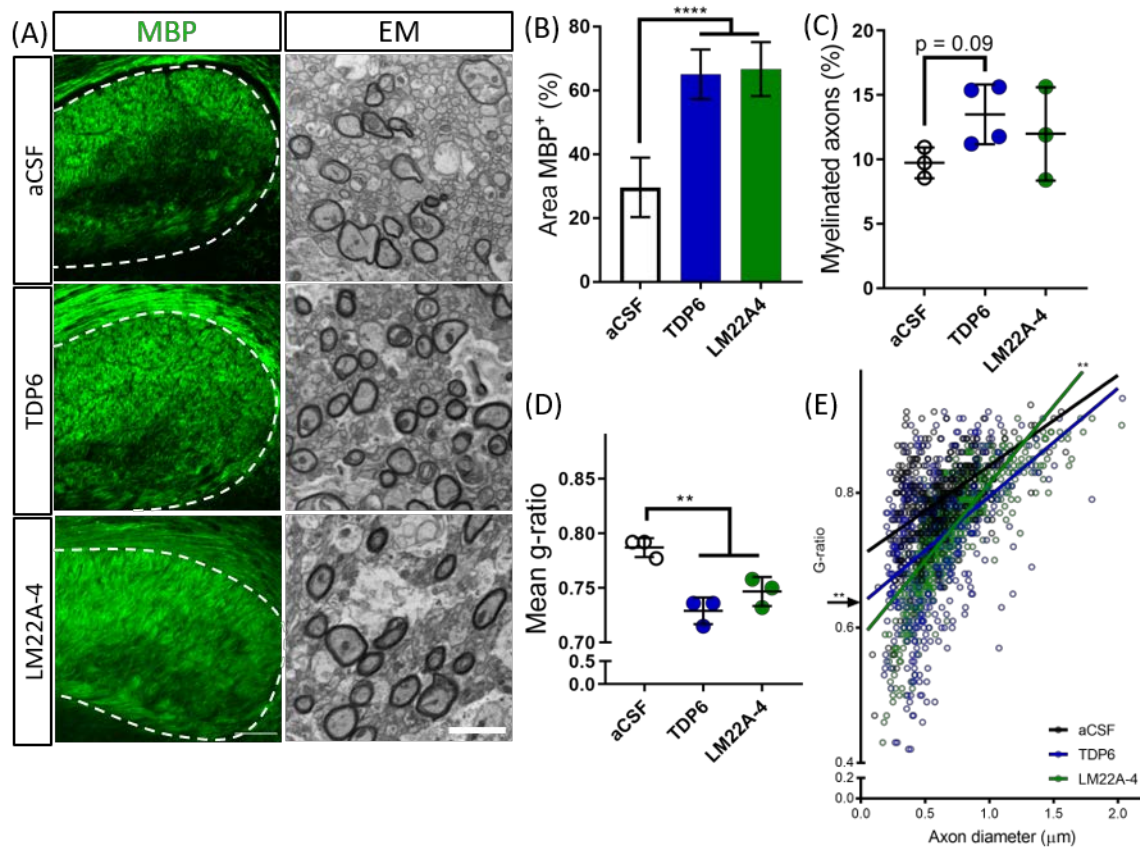

575

576 **Figure 1. BDNF-structural mimetic, TDP6 and TrkB agonist, LM22A-4 increase myelin sheath**  
 577 **thickness during remyelination in the cuprizone model of demyelination.** (A) Representative  
 578 MBP immunostaining (sagittal plane, scale bar=100µm) and electron micrographs (scale bar=2µm)  
 579 of the caudal corpus callosum of aCSF vehicle, TDP6 and LM22A-4 treated cuprizone demyelinated  
 580 mice. (B) Percentage of MBP staining increased ( $p<0.0001$ ) in TDP6 and LM22A-4 treated mice  
 581 compared to those that received aCSF vehicle ( $n=4-8$ /group). (C) The proportion of axons  
 582 remyelinated trended towards increasing with TDP6 treatment ( $p=0.09$ ) compared to aCSF, but was  
 583 unchanged between aCSF and LM22A-4 ( $p=0.48$ ) and LM22A-4 and TDP6 ( $p=0.31$ ,  $n=3-4$ /group),  
 584 however (D) the mean g-ratio was decreased ( $p=0.002$ ) in both TDP6 and LM22A-4 treated mice,  
 585 indicative of thicker myelin sheaths compared to those receiving aCSF vehicle ( $n=3$ /group). (E)  
 586 Scatter plot of g-ratio against axonal diameter. Linear regression revealed that TDP6 treatment  
 587 resulted in a decrease in y-intercept ( $p=0.0032$ ) but no change in slope ( $p=0.35$ ), while LM22A-4  
 588 treatment increased slope ( $p=0.0061$ ), both indicative of increased myelin sheath thickness compared  
 589 to aCSF treatment ( $n=3$ /group, min. 100 axons/animal). One-way ANOVA with Tukey's post-hoc  
 590 comparisons,  $p<0.05$  considered significant. Mean  $\pm$  SD plotted.

591

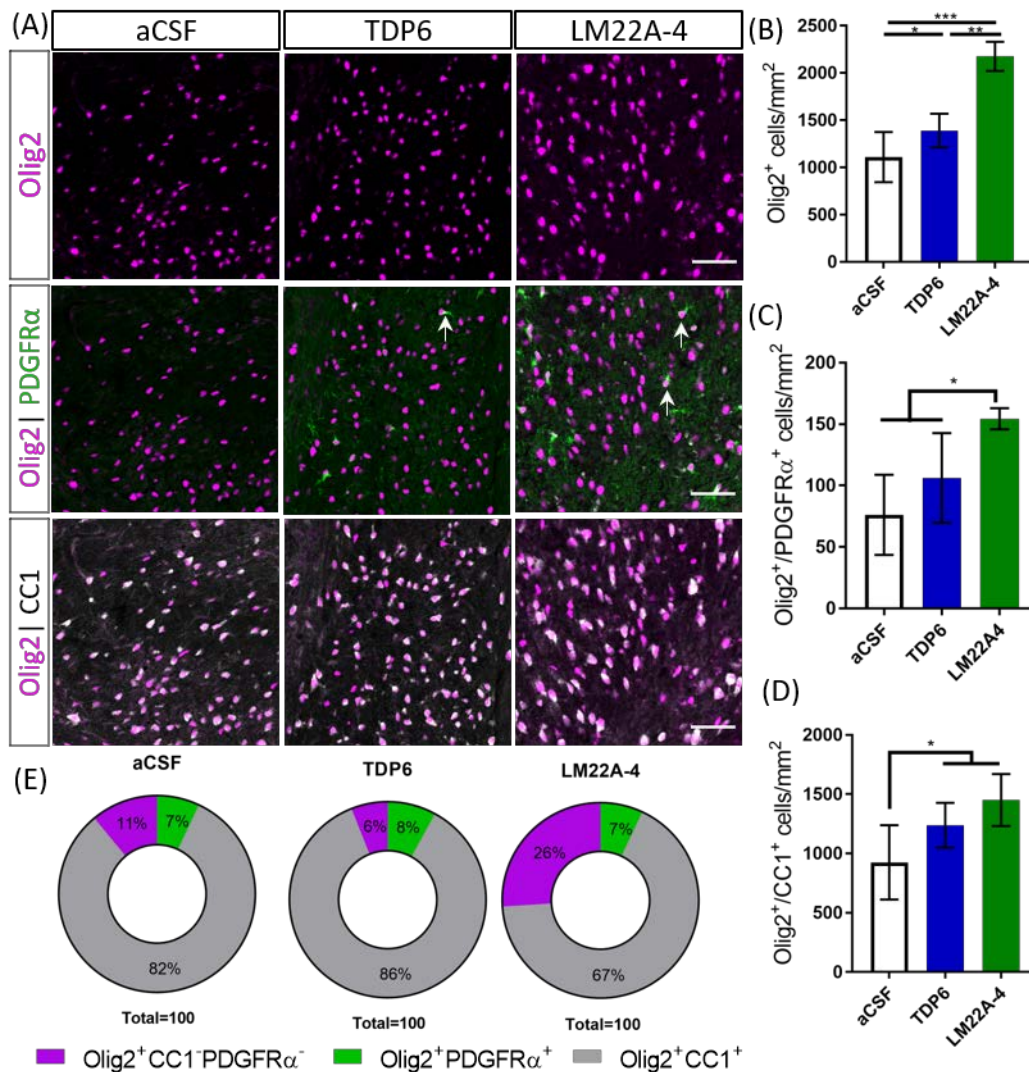

592

593 **Figure 2. TDP6 and LM22A-4 increase oligodendroglial densities in the corpus callosum during**  
 594 **remyelination in the cuprizone model of demyelination.** (A) Representative micrographs of Olig2-  
 595 CC1-PDGFR $\alpha$  immunostaining in the caudal corpus callosum of aCSF vehicle, TDP6 and LM22A-4  
 596 treated C57BL/6 mice. Arrows: Olig2<sup>+</sup>PDGFR $\alpha$ <sup>+</sup> OPCs (sagittal plane, scale bar=50 $\mu$ m). (B) Olig2<sup>+</sup>  
 597 densities increased with LM22A-4 treatment (p<0.0001) compared to treatment with TDP6, which  
 598 also increased Olig2<sup>+</sup> cell density (p=0.048) compared to the aCSF vehicle (n = 4-8/group). (C)  
 599 Olig2<sup>+</sup>PDGFR $\alpha$ <sup>+</sup> OPC densities increased with LM22A-4 infusion (p=0.009) compared to the aCSF  
 600 vehicle, but not compared to TDP6 treatment (p=0.12; n=4-8/group). (D) Both TDP6 (p=0.023) and  
 601 LM22A-4 (p=0.007) infusions increased Olig2<sup>+</sup>CC1<sup>+</sup> post-mitotic oligodendrocyte densities  
 602 compared to the aCSF vehicle (n=4-8/group). (E) LM22A-4 treatment increased (p<0.0001) the  
 603 proportion of Olig2<sup>+</sup> only oligodendroglia compared to TDP6 and aCSF treatment ( $\chi^2$  distribution  
 604 test). For (A-D) one-way ANOVA with Tukey's post-hoc comparisons, p<0.05 considered  
 605 significant. Mean  $\pm$  SD plotted.

606

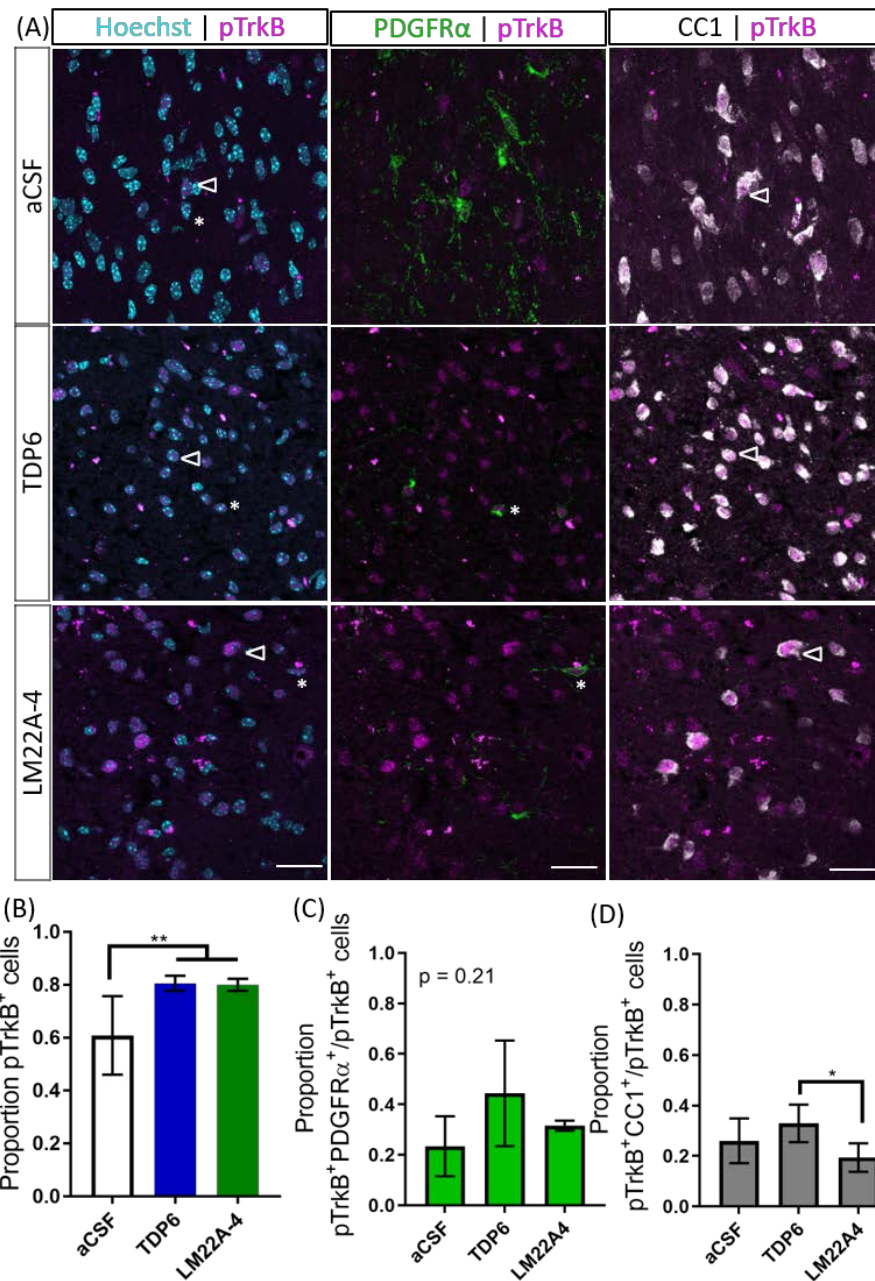

607

608 **Figure 3. Phosphorylation of TrkB in the corpus callosum during remyelination was elevated**  
 609 **following treatment with TDP6 and LM22A-4.** (A) Representative micrographs of pTrkB<sup>S478</sup>-  
 610 PDGFRα-CC1 immunostaining in the caudal corpus callosum of mice treated with aCSF vehicle,  
 611 TDP6 or LM22A-4 (sagittal plane, scale bar=20μm). Asterisk: pTrkB<sup>S478</sup>+PDGFRα<sup>+</sup> cell, open  
 612 arrowhead: pTrkB<sup>S478</sup>+CC1<sup>+</sup>. (B) Proportion of pTrkB<sup>S478</sup>+ cells increased (p=0.0022) in the corpus  
 613 callosum of mice treated with TDP6 and LM22A-4 compared to those that received aCSF vehicle  
 614 (n=4-8/group). (C) The proportion of pTrkB<sup>S478</sup>+ cells also PDGFRα<sup>+</sup> was unchanged across the three  
 615 different treatments (p=0.21, n=4-8/group), while (D) the proportion of pTrkB<sup>S478</sup>+CC1<sup>+</sup> cells  
 616 increased (p=0.045) in mice that received TDP6 infusion compared to those receiving LM22A-4  
 617 (n=4-8/group). One-way ANOVA with Tukey's post-hoc multiple comparisons, p<0.05 considered  
 618 significant. Mean ± SD plotted.

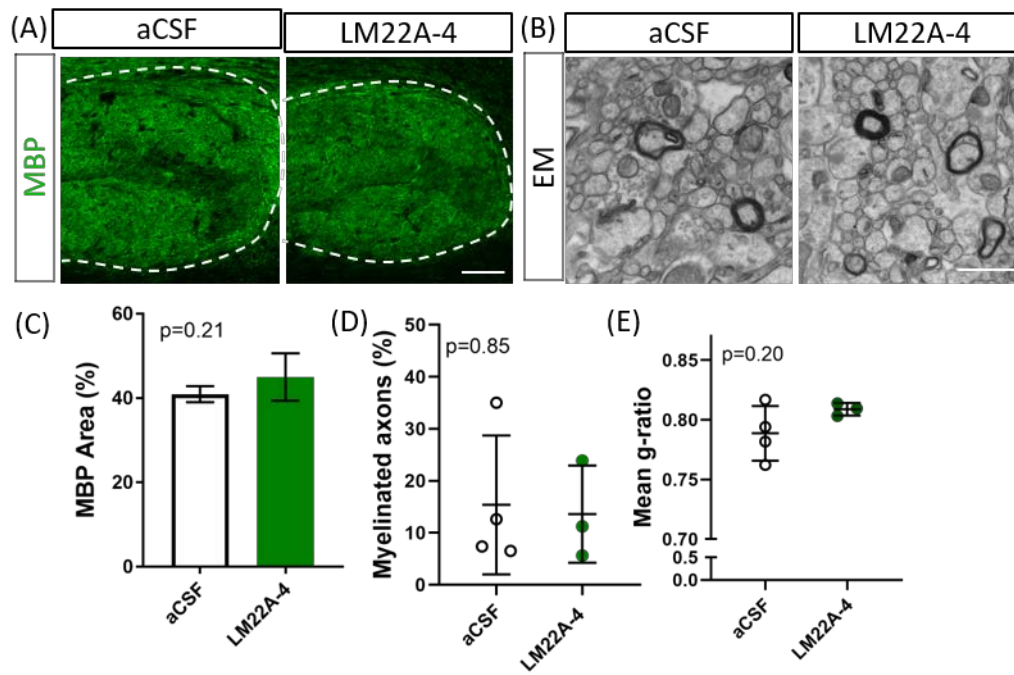

619

620 **Figure 4. The effects of LM22A-4 on myelin sheath thickness during myelin repair require**  
621 **oligodendrocyte TrkB.** (A) Representative micrographs of MBP immunostaining in the caudal  
622 corpus callosum of CNPaseCre<sup>+/-</sup> x TrkB<sup>fl/fl</sup> mice treated with aCSF vehicle or LM22A-4 (sagittal  
623 plane, scale bar=100μm). (B) Representative electron micrographs of the caudal corpus callosum of  
624 conditional TrkB knockout mice receiving aCSF vehicle or LM22A-4 (scale bar=2μm). (C) There  
625 was no change (p=0.21) in the percentage area of MBP<sup>+</sup> immunostaining in the corpus callosi of  
626 oligodendroglial TrkB knockout mice treated with LM22A-4 compared to the aCSF vehicle. (D) The  
627 proportion of myelinated axons was unchanged between oligodendroglial TrkB knockout mice  
628 receiving aCSF vehicle and LM22A-4. (E) There was also no change in myelin sheath thickness as  
629 indicated by mean g-ratio, with LM22A-4 in CNPaseCre<sup>+/-</sup> x TrkB<sup>fl/fl</sup> mice. For (D-E) unpaired t-test  
630 with equal variance, p<0.05 considered significant, n=3-4/group. Mean ± SD plotted.

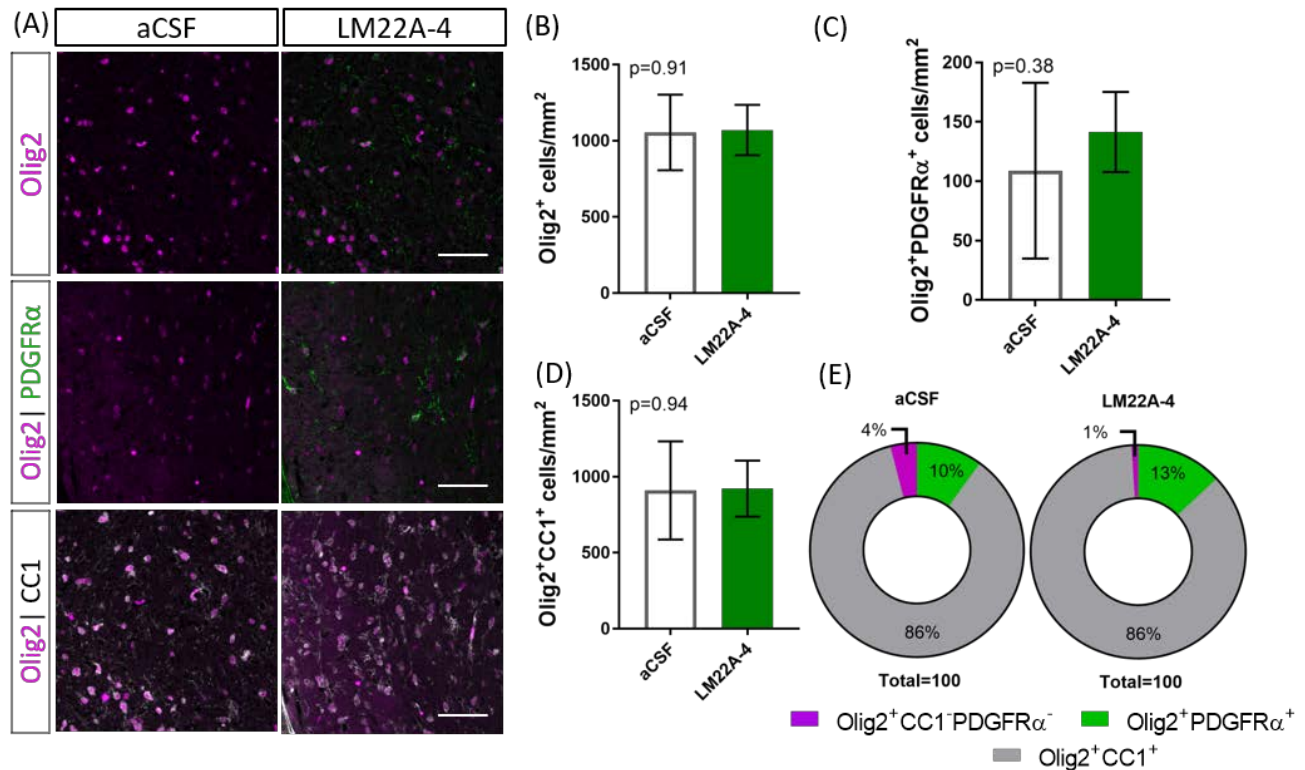

631

632 **Figure 5. Increased oligodendroglial density mediated by LM22A-4 during myelin repair**

633 **requires oligodendroglial TrkB.** (A) Representative micrographs of Olig2-CC1-PDGFR $\alpha$

634 immunostaining in the caudal corpus callosum of CNPaseCre<sup>+/-</sup> x TrkB<sup>fl/fl</sup> mice treated aCSF vehicle

635 or LM22A44 (sagittal plane, scale bar=20 $\mu$ m). (B) Density of Olig2<sup>+</sup> oligodendroglia was unchanged

636 (p=0.91) in TrkB conditional knockout mice treated with LM22A-4 compared to aCSF vehicle. (C)

637 Olig2<sup>+</sup>PDGFR $\alpha$ <sup>+</sup> OPC densities were unchanged (p=0.38) in oligodendroglial TrkB knockout mice

638 treated with LM22A-4 compared to aCSF vehicle. (D) Density of Olig2<sup>+</sup>CC1<sup>+</sup> oligodendrocytes in

639 TrkB conditional knockout mice was unchanged (p=0.94) with LM22A-4 infusion compared to aCSF

640 vehicle. (E) There was no change (p=0.34) in the proportion of oligodendroglia that were Olig2<sup>+</sup>

641 only, Olig2<sup>+</sup>PDGFR $\alpha$ <sup>+</sup> or Olig2<sup>+</sup>CC1<sup>+</sup> with LM22A-4 or a CSF vehicle treatment ( $\chi^2$  distribution

642 test). For (A-D) unpaired t-test with equal variance, p<0.05 considered significant, n=3-4/group.

643 Mean  $\pm$  SD plotted.

644

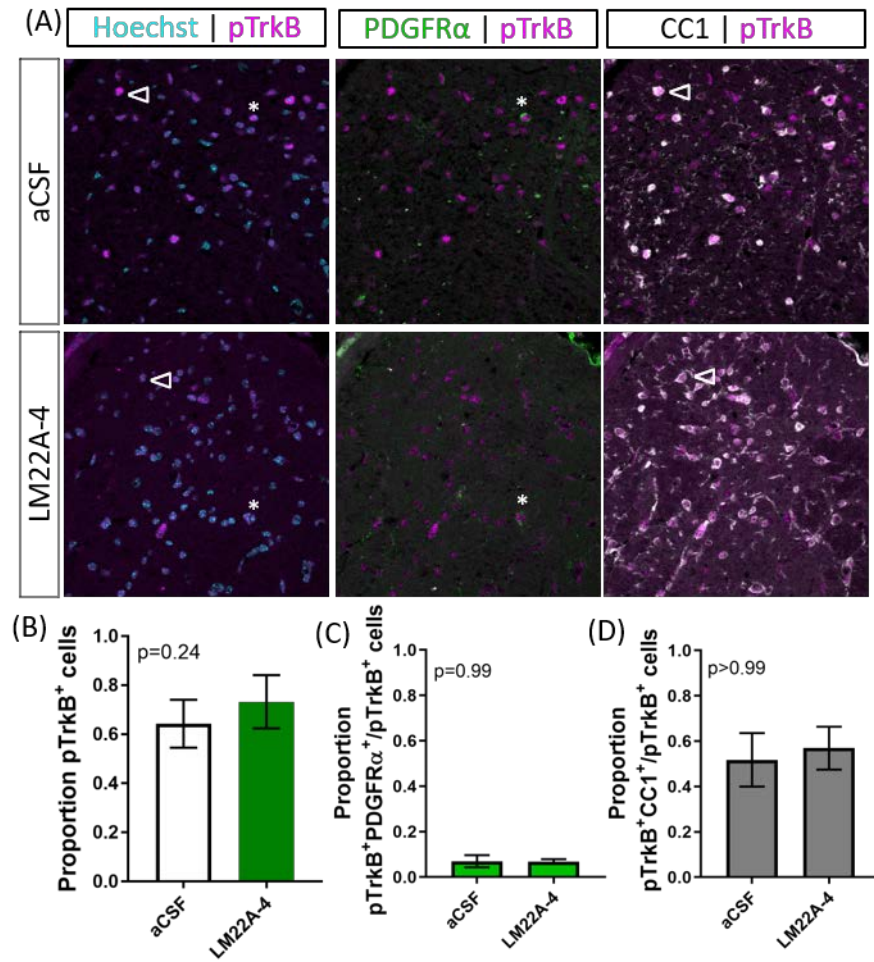

645

646 **Figure 6. TrkB phosphorylation with LM22A-4 treatment does not increase in the corpus**  
 647 **callosi of mice with oligodendroglial TrkB deleted.** (A) Representative micrographs of pTrkB<sup>S478</sup>-  
 648 PDGFRα-CC1 immunostaining in the corpus callosum of CNPaseCre<sup>+/-</sup> x TrkB<sup>fl/fl</sup> mice treated with  
 649 LM22A-4 or aCSF vehicle (sagittal plane, scale bar=20μm). (B) Proportion of pTrkB<sup>S478+</sup> cells was  
 650 unchanged (p=0.24) in oligodendroglial TrkB knockout mice treated with LM22A-4 compared to  
 651 aCSF vehicle. Similarly, (B) the proportions of pTrkB<sup>S478+</sup> PDGFRα<sup>+</sup> and (C) pTrkB<sup>S478+</sup>CC1<sup>+</sup> cells  
 652 were not changed (p=0.99, p>0.99 respectively) in conditional knockout mice treated LM22A-4  
 653 compared to those that received aCSF vehicle. Unpaired t-test with equal variance, p<0.05  
 654 considered significant, n=3-4/group. Mean ± SD plotted.

655

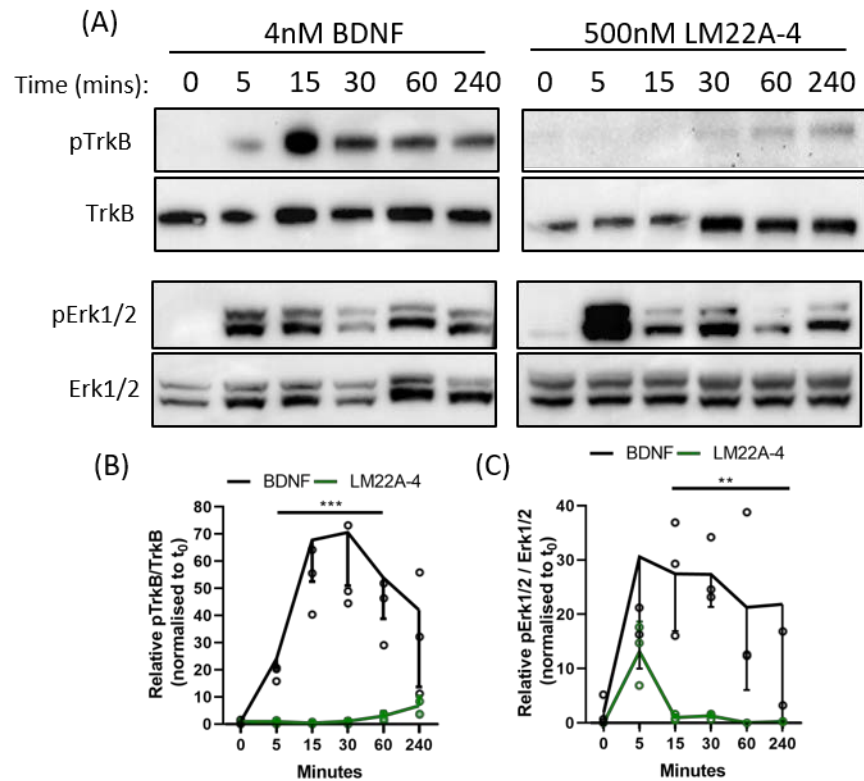

656

657 **Figure 7. Dynamics of TrkB signaling initiated by LM22A-4 do not mimic BDNF in a stably**  
 658 **expressing TrkB isogenic HEK293 cell line.** (A) Representative western blots of isogenic TrkB  
 659 FlpIn HEK293 cell lysates treated with 4nM BDNF or 500nM LM22A-4 over a time course of 0, 5,  
 660 15, 30, 60 and 240 mins. Densitometric analysis of western blots revealed that (B) BDNF elevated  
 661 (p=0.0003) levels of phosphorylated TrkB from 5mins until 240mins when it returned to similar  
 662 levels elicited by LM22A-4 treatment, which did not increase over time (p=0.10). (C) Levels of  
 663 Erk1/2 phosphorylation increased (p=0.002) after 5mins of BDNF treatment was sustained until  
 664 240mins, while phosphorylated Erk1/2 levels mediated by LM22A-4 treatment were similar to those  
 665 evoked by BDNF at 5mins (p=0.051), but elevated levels were not sustained. Mixed effects model,  
 666 fixed effects: treatment and time, random effects: plate, n=3 independent cultures, p<0.05 considered  
 667 significant. Mean  $\pm$  SD plotted.

668



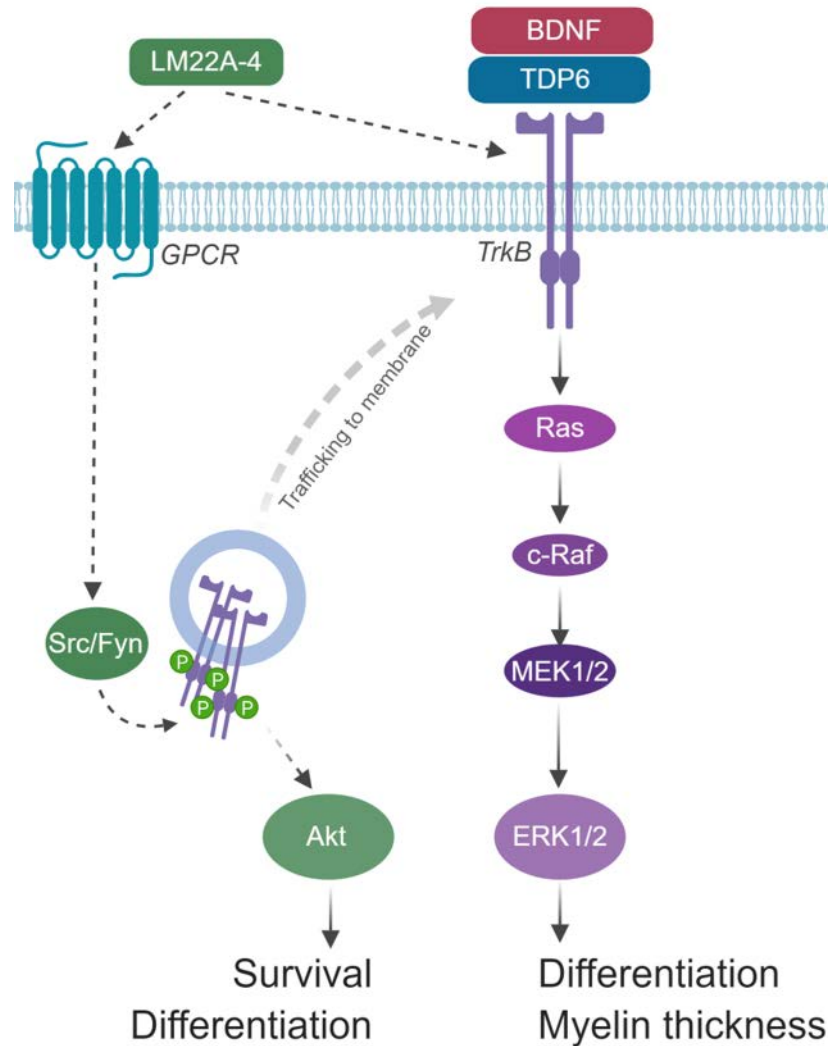

669

670 **Figure 8. Schematic of hypothesized mode of action for LM22A-4 in promoting remyelination.**  
 671 LM22A-4 acts as a ligand to directly activate an unidentified GPCR, which initiates Src-family  
 672 kinase, most likely Fyn, activation. Src-family members regulate the phosphorylation of Trk  
 673 receptors on intracellular membranes, initiating Trk-specific signaling potentially biased towards  
 674 PI3K/Akt, which regulates oligodendrocyte survival and differentiation. Activated Trk receptors may  
 675 subsequently be trafficked to the cell membrane to initiate typical Trk signaling.  
 676 Figure made in ©BioRender – biorender.com)
